# Abnormal spontaneous neural activity of auditory cortex and auditory pathway in tinnitus: a resting-state fMRI study

Wei-Wei Cai<sup>2</sup>, Jian-Gang Liang<sup>2</sup>, Zhi-Hui Li<sup>2</sup>, Yu-Lin Huang<sup>2</sup>, Li Wang<sup>3</sup>, Tao Zhang<sup>1</sup>

1. Department of Otolaryngology-Head & Neck Surgery, The First Affiliated Hospital of Jinan University, Guangzhou, Guangdong 510630, P.R. China

2. Department of Otolaryngology-Head & Neck surgery, Panyu Central Hospital, Guangzhou, Guangdong 511400, P.R. China

3. Department of Radiology, Guangzhou Panyu Central Hospital, Guangzhou, Guangdong 511400, P.R. China

\*For correspondence: [tzhangt@jnu.edu.cn](mailto:tzhangt@jnu.edu.cn)

Competing interests: The authors have no competing interests to declare.

## Abstract

This resting-state functional magnetic resonance imaging (rs-fMRI) study in tinnitus patients was conducted to observe the spontaneous neural activity of the central auditory system using a derived index, mean amplitude of low-frequency fluctuation (mALFF). Tinnitus subjects with right-ear hearing impairment (THL) and without hearing loss (TNH) and two age-, sex-, and education-matched control groups (NC1 and NC2) were recruited for rs-fMRI. mALFF maps of the tinnitus and matched NC groups were plotted in the central auditory system, including the primary auditory cortex (PAC), higher auditory cortex (HAC), and hubs of the central auditory pathway. mALFF values of the activity clusters in the central auditory system of THL and TNH patients were extracted and correlated with each clinical characteristic. Significantly increased mALFF clusters were found in bilateral PAC and HAC of THL-NC1 maps and in the left inferior colliculus and right HAC of TNH-NC2 maps. Thus, subgroups of tinnitus with and without hearing impairment might exhibit different homeostatic plasticity in the central auditory system. mALFF values of aberrant active clusters in the central auditory system are partly associated with specific clinical tinnitus characteristics.

**Keywords:** Resting-state functional magnetic resonance imaging, amplitude of low-frequency fluctuation, tinnitus, auditory cortex, auditory pathway, spontaneous neural synchrony

## Introduction

The contemporary view of the mechanism of tinnitus is that the absence of an input from the auditory periphery induces numerous plastic readjustments and aberrant states of activation, including hyperactivity, bursting discharges, and increases in neural synchrony in the central

auditory and non-auditory systems (Mühlnickel, et al.,1998; Daniel A. Llano and Caspary,2012; Mulders and Robertson,2013; Chen, et al.,2014). The prevalence of tinnitus ranges from 10–15% in the adult population. (Xu, et al.,2011; Hoffman,2014). Hearing impairment, increasing age, and male sex have been identified as the most relevant risk factors for tinnitus (Hoffman,2014). Many patients with tinnitus have reported symptoms such as frustration, annoyance, irritability, anxiety, depression, hearing difficulties, hyperacusis, insomnia, and concentration difficulties. These symptoms are highly relevant to tinnitus severity and impair patients' quality of life (Langguth,2011).

An important aspect during the onset of tinnitus is the spontaneous neural active changes in the central auditory system. Evidence from animal models of tinnitus indicates that abnormal states of neuronal activity in the auditory cortex and auditory pathway are the source of tinnitus in humans (Dong, et al.,2010; Ralli, et al.,2010). However, the main disadvantage of using animal physiological models is that these have not directly proven that animals are experiencing tinnitus. More recently, methods have been developed to measure changes in hemodynamics in tinnitus patients, using functional magnetic resonance imaging (fMRI); these methods include measuring fMRI neural activation with sound stimulation in auditory regions (Smits, et al.,2007; Lanting, et al.,2008; Gu, et al.,2010), resting state of the auditory region and functional connectivity with coherent networks (Maudoux, et al.,2012, 2012; Chen, et al.,2014, 2015), and combining functional connectivity using resting-state fMRI (rsfMRI) and structural MRI (Landgrebe, et al.,2009; Husain, et al.,2011; Seydell-Greenwald, et al.,2014). The main findings, when measuring fMRI activation with sound stimulation in tinnitus, are as follows: elevated neural activity, upon sound stimulus, in the inferior colliculus and primary auditory cortex is related with hyperacusis but not tinnitus (Gu, et al.,2010). In studies of tinnitus using rsfMRI, there are three popular methods of analysis: seeding, graphic connectivity analysis, and independent component analysis (ICA). The main findings in these studies show abnormal relationships in tinnitus patients between the auditory resting-state network and the following networks: default-mode, limbic, dorsal attention, and visual networks (Burton, et al.,2012; Kim, et al.,2012; Maudoux, et al.,2012, 2012). The foundation of functional connectivity was a signal change in different cerebrum regions with the connectivity of structures in different brain regions. The following studies combined anatomical and functional connectivity within the same framework, using diffusion tensor imaging and blood oxygen level-dependent (BOLD) functional connectivity and reported altered connecting regions from the inferior colliculus and amygdala to the auditory cortex. The findings of these studies imply a mechanism for accompanying syndromes in tinnitus patients.

rs-fMRI was developed to provide a new method for evaluation of regional neural spontaneous activity level in low frequency (0.01–0.08 Hz) fluctuation (ALFF) of the BOLD signal change (Biswal, et al.,1995; Kiviniemi, et al.,2000; Zang, et al.,2007). Combining electroneurophysiological recordings and fMRI, many studies have suggested that the LFFs of BOLD fMRI signals are closely related to spontaneous neuronal activities (Lu, et al.,2007; Mantini, et al.,2007; Shmuel and Leopold,2008; Rusiniak, et al.,2015; Shtark, et al.,2015).

Notably, ALFF is reported to be higher in gray matter than in white matter. (Biswal, et al.,1995) Previous studies have confirmed the use of ALFF as an index to assess the regional synchronization of neural activity in multiple neuropsychiatric diseases, including cognitive dysfunction, chronic tinnitus and premenstrual syndrome (Kiviniemi, et al.,2000; Chen, et al.,2014; Huang, et al.,2017; Lei, et al.,2017). In the field of tinnitus research, existing studies have largely focused on aspects of abnormal functional connectivity between the auditory cortex and other non-auditory regions (Chen, et al.,2014). These reports suggest that the source of phantom tinnitus originates from abnormal spontaneous neural activity in the central auditory system in animal studies (Daniel A. Llano and Caspary,2012; Mulders and Robertson,2013; Chen, et al.,2014).

Our study was conducted to characterize the relationship between regional, abnormal, spontaneous neural activity in the central auditory system and mean ALFF (mALFF) in multiple levels of the central auditory system. We hypothesized that tinnitus patients may exhibit different values of mALFF within activity clusters of the central auditory system, which might thereby correlate with clinical presentation of tinnitus.

## Materials and methods

### Subjects

This study utilized data from four groups of subjects: tinnitus with hearing loss group (THL), normal control group 1 (NC1), tinnitus without hearing loss group (TNH), and normal control group 2 (NC2). The tinnitus groups were recruited from outpatient clinics at the Otorhinolaryngology Department of Guangzhou Panyu Central Hospital and from the First Affiliated Hospital of Jinan University, Guangzhou, China, from March 2015 to May 2017. NC groups 1 and 2 were matched in age, sex, and education to THL and TNH, respectively. Both THL and TNH groups comprised 12 patients with reported right-ear-tinnitus, tinnitus duration of >6 months, ages of 18–55 years, and right-handedness. Pure-tone audiometry was performed with a clinical audiometer using six octave frequencies (0.25, 0.5, 1, 2, 4, and 8 kHz). The audio thresholds of THL and TNH patients are shown in Fig. 1 and Fig. 2.

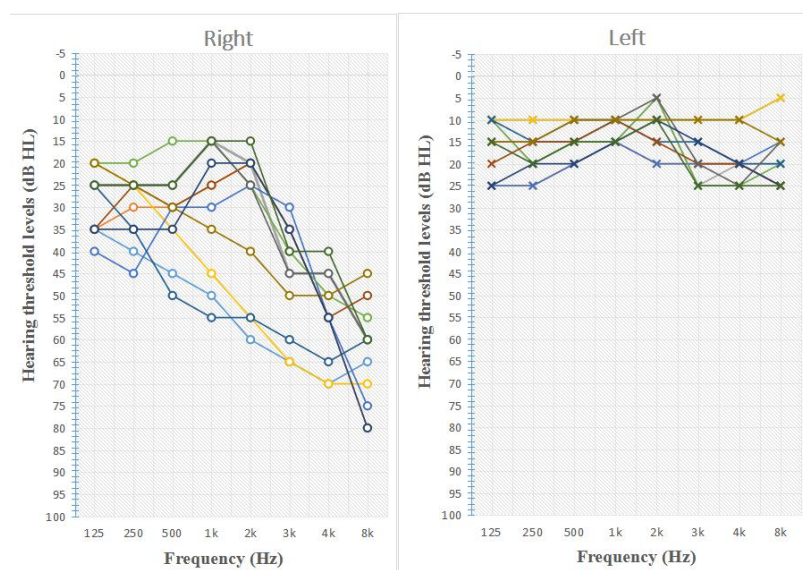

**Fig. 1** Characteristic hearing levels in the tinnitus with hearing loss (THL) group.

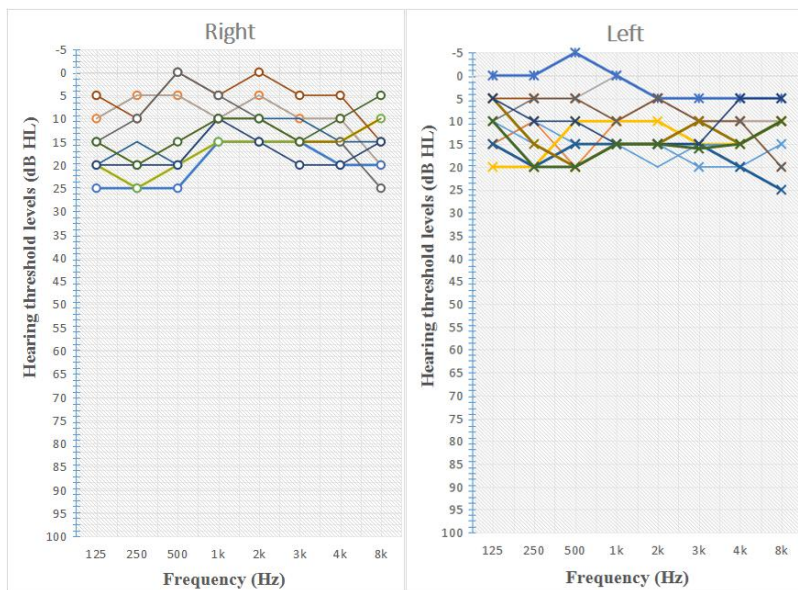

**Fig. 2** Characteristic hearing levels in the tinnitus without hearing loss (TNH) group.

The severity of tinnitus was assessed by a Chinese translation of the Tinnitus Handicap Inventory (THI), a self-reported tinnitus handicap questionnaire (Meng, et al.,2012). Group NC1 contained 30 subjects; group NC2 contained 30 subjects. All subjects were confirmed to have a Self-Rating Depression Scale (SDS) score of <50 and a Self-Rating Anxiety Scale (SAS) score of <50 (Zung,1971, 1986). All individuals provided written informed consent before participation in the study protocol. This study was approved by the Research Ethics Committee of Guangzhou Panyu Central Hospital and the First Affiliated Hospital of Jinan University, Guangzhou.

We excluded subjects with any of the following: Meniere disease; conductive deafness; alternative hearing level; cognitive or mental disorders; serious systemic diseases, such as heart failure or diabetes; epilepsy, alcoholism or use of psychiatric drugs; pregnancy; acoustic neuroma, brain stem or inferior colliculi diseases; hyperacusia; smoking; stroke; brain injury; Alzheimer's disease; Parkinson's disease. Table 1 summarizes the characteristics of tinnitus patients and NC subjects in this study.

### **MRI data acquisition**

All subjects underwent GE3.0T MRI (Discovery MR750) in the Imaging Center of the First Affiliated Hospital of Jinan University. Before MRI, all subjects lied in the examination bed with MRI noise-cancelling headphones and dual earplugs (Mack's noise reduction ear plugs, USA) to reduce the noise level by 32 dB. To reduce head motion, we fixed a foam pad around the head of subjects. All subjects were asked to maintain a relaxed, resting state, including eyes closed, and to avoid serious thought, for approximately 20 minutes. BOLD signal acquisition conditions were defined as: 33 layers; repetition time (TR), 2000 ms; echo time (TE), 30 ms; layer thickness, 3 mm; flip angle, 90°; field of view (FOV), 200 × 200 mm; acquisition matrix, 64 × 64; and time points,

160. T1-weighted structure, using 3D T1-weighted fast gradient echo sequence, was performed as follows: sagittal scan, 175 layers of sagittal anatomical images; TR, 7.63 ms; TE, 3.74 ms; layer thickness, 1 mm; flip angle, 8°; FOV, 256 × 256 mm; and acquisition matrix, 256 × 256. The scanning range included the whole brain.

### **Regions of interest and mask setting**

The auditory cortex was utilized from the SPM anatomy toolbox v1.8 ([http://www.fz-juelich.de/inm/inm-1/DE/Forschung/\\_docs/SPMANatomy-Toolbox/SPMANatomyToolbox\\_node.htm](http://www.fz-juelich.de/inm/inm-1/DE/Forschung/_docs/SPMANatomy-Toolbox/SPMANatomyToolbox_node.htm)), including the primary auditory cortex (combination of area Te 1.0, 1.1, and 1.2) (Morosan, et al.,2001) and higher auditory cortex (Morosan, et al.,2005; NeuroImage,2005). The auditory pathway was based on Regions of Interest (ROI) reported by Muhlau et al. The ROI were defined as spheres with a radius of 5 mm centered at ±10, -38, -45 (MNI coordinates) for the cochlear nuclei ; ±13, -35, and -41 for the superior olivary complex; ±6, -33, -11 for the inferior colliculus; and ±17, -24, and -2 for the medial geniculate (Mühlau, et al.,2006). We define primary auditory cortex, higher auditory cortex, and all points in the auditory pathway, as the central auditory system mask, which we marked by Marsbar, a toolbox of region of interest analysis (Brett, et al.,2002).

### **Data processing**

All functional MRI data were processed by DPABI (a toolbox for Data Processing & Analysis for Brain Imaging) V2.3 (Yan, et al.,2016) for data processing, including: time correction, reorientation of T1 and functional image data, coregistration of T1 and functional image data, head motion correction, spatial normalization by diffeomorphic anatomical registration through exponentiated lie algebra, de-linear drift, filter processing (0.01–0.08 Hz), and cerebrospinal fluid signal processing. Gray matter images were extracted from T1 image data. ALFF results were divided by mean value of the whole brain to generate mALFF images.

### **Statistical analysis**

#### **Statistical analysis in mALFF images between groups**

We used the DPABI (a toolbox for Data Processing & Analysis for Brain Imaging, V2.3) (Yan, et al.,2016) statistical analysis function to perform calculations between groups of images. The two-sample *t*-test was used to compare mALFF maps of THL with NC1, and TNH with NC2, within the mask of the auditory system. Gray matter was added as a covariate.

We performed 5000 permutations tests using the Threshold Free Cluster Environment (TFCE) (Winkler, et al.,2016). The cluster forming threshold *z* was set to 3.1; a threshold-free cluster-enhanced technique (Nichols,2010) was used to control for multiple comparisons and evaluate the voxel-wise significant differences among the groups.

### **Correlation analysis**

To investigate the relationship between the mALFF of activity clusters (in the central auditory system) and clinical data of tinnitus patients, we extracted mALFF values from activity clusters in the central auditory system of THL and TNH subjects. Subsequently, Pearson's correlation coefficients were used to compare values of mALFF with each clinical characteristic of tinnitus subjects, via analysis by the corrplot tool kit of R software (Core,2015).

## Results

### Comparison clinical data between groups

There were no differences in clinical data between any tinnitus patient groups and any healthy control groups. (Table 1).

|                                        | THL         | NC1         | <i>P1</i> value | TNH         | NC2        | <i>P2</i> value |
|----------------------------------------|-------------|-------------|-----------------|-------------|------------|-----------------|
| Gender (male/female)                   | 8/4         | 13/17       | 0.237           | 4/8         | 12/18      | 0.689           |
| Age (years)                            | 39.5±11.49  | 37.00±11.75 | 0.603           | 35.33±10.70 | 35±10.10   | 0.720           |
| Education (years)                      | 14±1.48     | 14.25±1.55  | 0.689           | 13.50±1.57  | 13.25±1.75 | 0.698           |
| SDS score                              | 38.67±9.36  | 36.25±8.04  | 0.661           | 34.67±7.30  | 35.25±6.33 | 0.274           |
| SAS score                              | 35.17±10.50 | 38.75±6.26  | 0.341           | 35.67±9.37  | 37.65±7.23 | 0.240           |
| Tinnitus ear<br>(Left/Right/Bilateral) | 0/13/0      | \           | \               | 0/10/2※     | \          | \               |
| THI score                              | 68.50±4.36  | \           | \               | 55.33±11.03 | \          | \               |
| Tinnitus duration (months)             | 31.58±21.94 | \           | \               | 36.58±18.03 | \          | \               |
| Frequency range of tinnitus            | 4–6 kHz     | \           | \               | 5–8kHz      | \          | \               |

※Two subjects have dominating right ear tinnitus. THL, tinnitus with hearing loss; NC1, normal controls group 1; TNH, tinnitus without hearing loss; NC2, normal controls group 2; SDS, Self-rating Depression Scale; SAS, Self-rating Anxiety Scale; THI, Tinnitus Handicap Inventory.

### Comparison of mALFF in auditory cortex and auditory pathway between groups

### THL and NC1

Analyses, using two-sample *t*-tests, revealed significant clusters of mALFF maps between THL and NC1 subjects. Significantly increasing mALFF clusters can be found in bilateral higher auditory cortex (HAC, Fig. 3 A) and primary auditory cortex (PAC, Fig. 3 B). There were no significant different clusters in the auditory pathway (AP). Cluster characteristics are shown in Table 2.

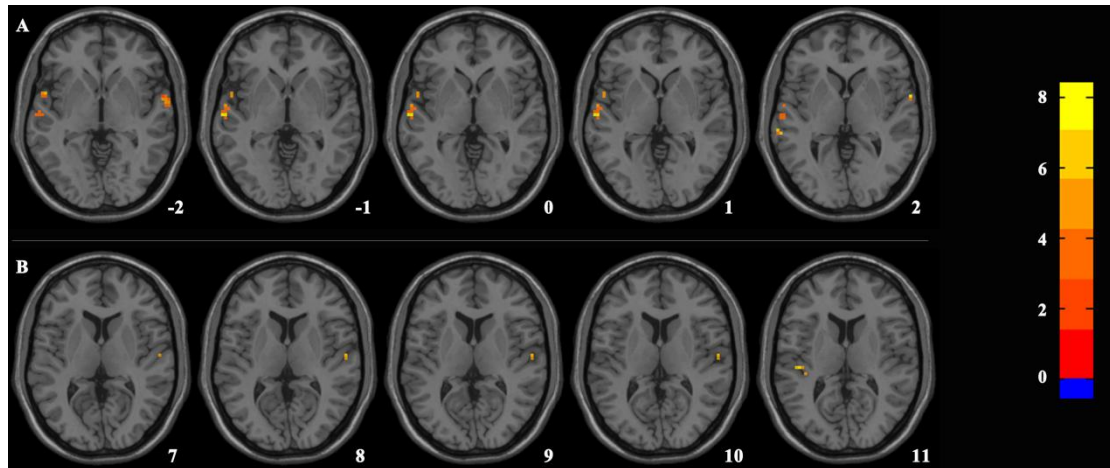

**Fig. 3 Significant mean amplitude of low-frequency fluctuation (mALFF) differences in tinnitus patients with hearing loss, compared with healthy control group 1.** A shows different clusters of mALFF in higher auditory cortex. B shows different clusters of mALFF in primary auditory cortex. The 5000 permutations test was performed and the cluster-forming threshold was set to  $p = 0.001$  ( $z = 3.1$ ), with a threshold-free cluster-enhanced technique.

### TNH and NC2

Analyses using a two-sample *t*-test revealed significant clusters of mALFF maps between TNH and NC2. Significantly different mALFF clusters were found in left PAC, left HAC (Fig. 4 A), and right AP (Fig. 4 B). Cluster characteristics are shown in Table 2.

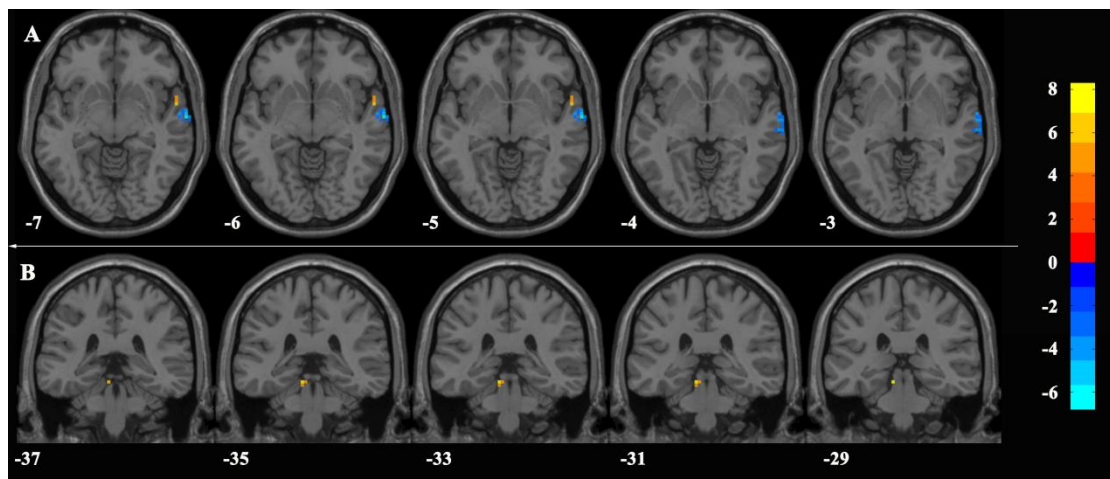

**Fig. 4 Significant mean amplitude of low-frequency fluctuation (mALFF) differences in tinnitus patients**

**without hearing loss, compared with healthy control group 2** A shows different clusters of mALFF in higher auditory cortex. B shows different clusters of mALFF in the auditory pathway. The 5000 permutations test was performed and the cluster-forming threshold was set at  $p = 0.001$  ( $z = 3.1$ ), with a threshold-free cluster-enhanced technique.

**Table 2 Activity clusters of mean amplitude of low-frequency fluctuation (mALFF) of tinnitus patient groups, compared with healthy control groups, in auditory regions**

| Location | Number of clusters | Sum Voxels (Left/Right) | Clusters size | Peak score | Peak MNI coordinates<br>x, y, z (mm) | mALFF value of active clusters |    |
|----------|--------------------|-------------------------|---------------|------------|--------------------------------------|--------------------------------|----|
|          |                    |                         |               |            |                                      | TG                             | NC |
| THL      | HAC                | 2                       | 49/29         | 8.501      | -63, -15, 0                          | 1.871 ± 0.185 / 1.054 ± 0.089  |    |
|          | PAC                | 2                       | 4/3           | 7.245      | -45, -24, 12                         | 1.873 ± 0.119 / 1.173 ± 0.242  |    |
|          | AP                 | 0                       | \             | \          | \                                    | \                              |    |
| TNH      | HAC                | 1                       | 0/64          | -4.433     | 69, -9, 6                            | 0.830 ± 0.126 / 1.086 ± 0.145  |    |
|          |                    | 1                       | 0/4           | 5.969      | 57, 3, -6                            | 1.999 ± 0.317 / 0.935 ± 0.245  |    |
|          | PAC                | 0                       | \             | \          | \                                    | \                              |    |
|          | AP*                | 1                       | 4/0           | 6.979      | -9, -33, -15                         | 2.208 ± 0.301 / 1.525 ± 0.524  |    |

AP\*: Auditory pathway, the peak MNI coordinates of active cluster was -9, -33, -15; this was located in left inferior colliculus, one regions of interest in auditory pathway, at -6, -33, -11; radius = 5 mm. THL, tinnitus with hearing loss; TNH, tinnitus without hearing loss; HAC, higher auditory cortex; PAC, primary auditory cortex. TG: tinnitus groups; NC: normal control

### **Correlation analysis between mALFF values of activity clusters in auditory system and tinnitus clinical data**

In the THL group, the average mALFF values of activity clusters in HAC and PAC were extracted and correlated with the right ear average hearing threshold (RAHT), duration of tinnitus months (DTM), THI, SDS, and SAS. Color coding (Fig. 5) indicates the value of the coefficient of the Pearson correlations (R) between the mALFF values of activity clusters in the auditory cortex and clinical data. mALFF value correlated with the RAHT in PAC and HAC, THI in HAC, SDS in HAC, and SAS in HAC (correlation intensity:  $p < 0.01$ ) (Figs.6).



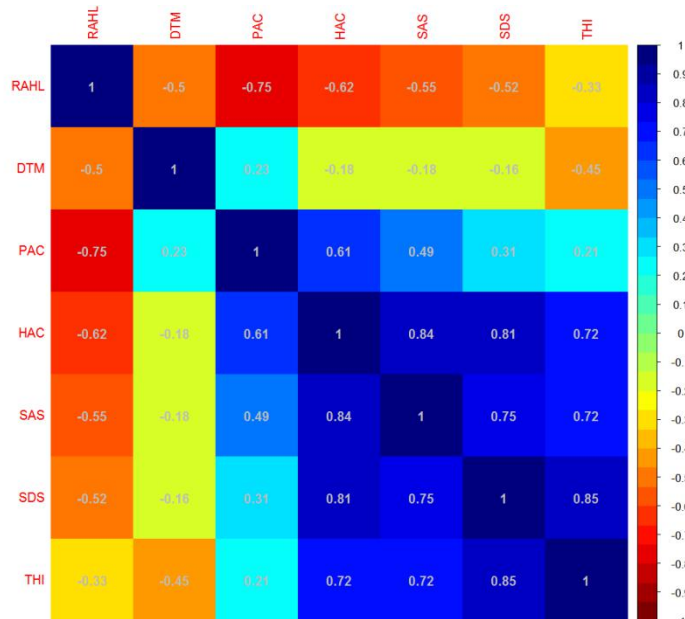

**Fig. 5** Color-coding indicates the value of the coefficient of Pearson correlations ( $R$ ) between the mean amplitude of low-frequency fluctuation (mALFF) values of activity clusters in auditory cortex and clinical data RAHL: Right-ear average hearing threshold; DTM: duration of tinnitus months; HC: value of activity clusters in higher auditory cortex. AC: mean amplitude of low-frequency fluctuation (mALFF) value of activity clusters in primary auditory cortex. DTM: duration of tinnitus months. SDS: Self-Rating Depression Scale. SAS: Self-Rating Anxiety Scale. THI: Tinnitus Handicap Inventory.

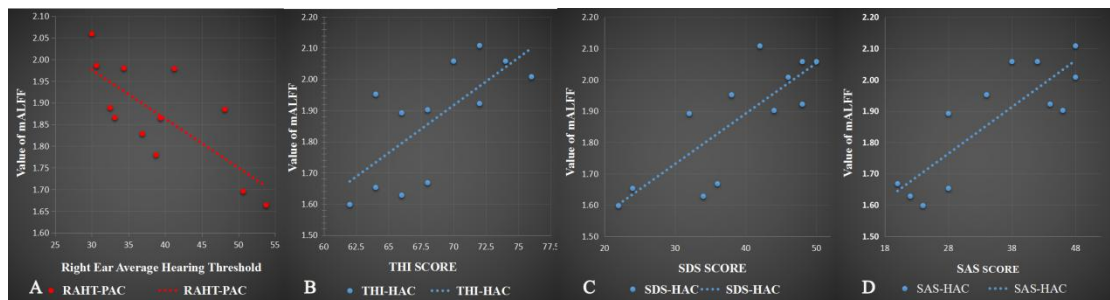

**Fig. 6** Pearson correlations between clinical parameters (RAHL, THI score, SDS score, and SAS score) and mean amplitude of low-frequency fluctuation (mALFF) values of activity cluster in primary auditory cortex and higher auditory cortex (A) RAHL-PAC:  $r = -0.754$ ,  $p = 0.005$ . (B) THI-HAC:  $r = 0.718$ ,  $p = 0.009$ . (C) SDS-HAC:  $r = 0.814$ ,  $p = 0.001$ . (D) SAS-HAC:  $r = 0.843$ ,  $p = 0.001$ .

In the TNH group, the average mALFF values of activity clusters in HAC and AP were extracted and correlated with clinical data, including DTM, THI, SDS, and SAS. The color-coding (Fig. 7) indicates the value of the coefficient of Pearson correlations ( $R$ ) between clinical data and the mALFF value of activity clusters in the auditory cortex. mALFF values correlated with the DTM, THI, SDS, SAS, and with the mALFF value in the activity cluster in the ROI of inferior colliculus (IC;  $\pm 6, -33, -11$ , radius = 5 mm) and active clusters in right HAC. The correlation intensity of DTM-IC, THI-IC, THI-IHAC, SDS-IC, SDS-DHAC, and SAS-DHAC were  $p < 0.01$ , whereas the correlation intensity of SAS-IC was  $p < 0.05$ . (Fig. 8).

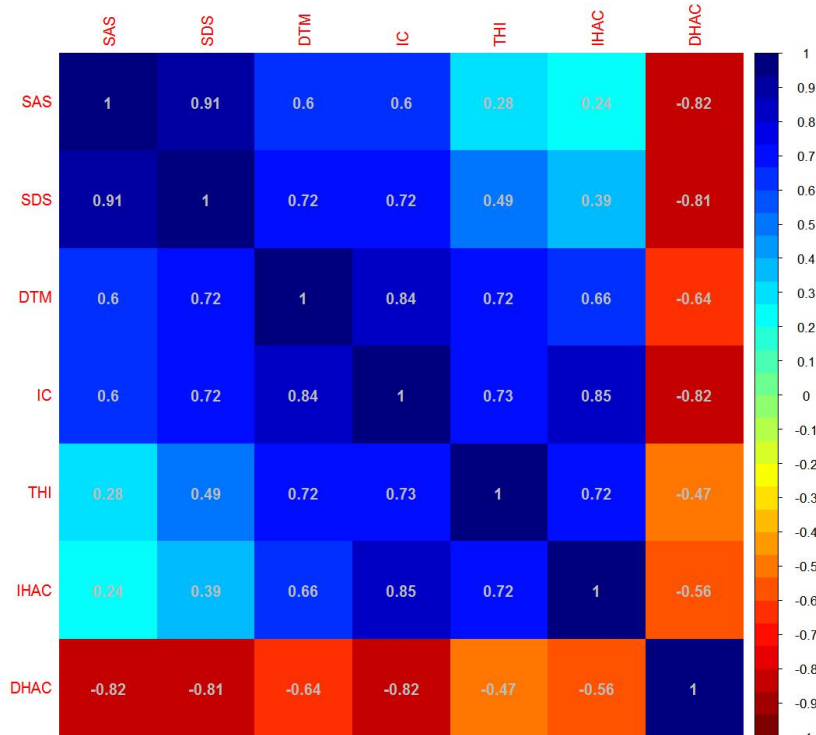

**Fig. 7** Color-coding indicates the value of the coefficient of Pearson correlation (**R**) between the mean amplitude of low-frequency fluctuation (mALFF) values of activity clusters in the central auditory system and clinical data DTM: duration of tinnitus months, IC: value of mALFF in activity cluster of inferior colliculus. DTM: duration of tinnitus months. SDS: Self-Rating Depression Scale. SAS: Self-Rating Anxiety Scale. THI: Tinnitus Handicap Inventory. IHAC: increased value of mALFF in active cluster of higher auditory cortex. DHAC: decreased value of mALFF in active cluster of higher auditory cortex.

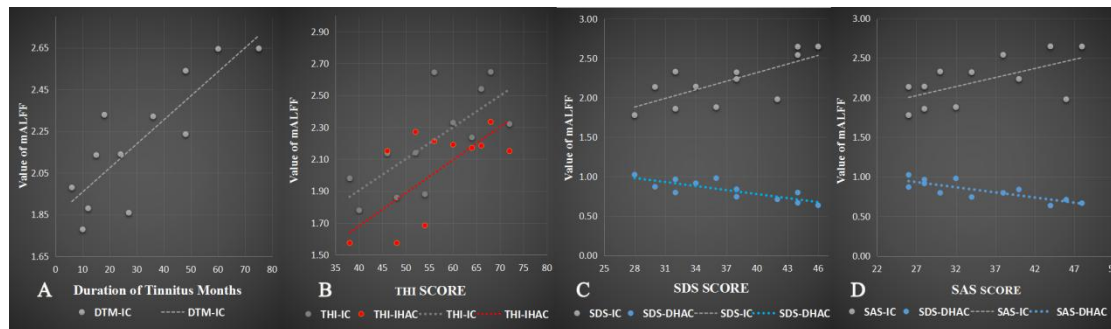

**Fig. 8** Pearson correlations between DTM, THI score, SDS score, SAS score, and mean amplitude of low-frequency fluctuation (mALFF) values of activity clusters in the HAC and left inferior colliculus (IC) (A) DTM-IC:  $r = 0.840$ ,  $p = 0.001$ . (B) THI-IC,  $r = 0.734$ ,  $p = 0.008$ . THI-IHAC:  $r = 0.722$ ,  $p = 0.008$ . (C) SDS-IC,  $r = 0.723$ ,  $p = 0.008$ . SDS-DHAC:  $r = -0.81$ ,  $p = 0.001$ . (D) SAS-IC:  $r = 0.604$ ,  $p = 0.038$ . SAS-DHAC:  $r = 0.820$ ,  $p = 0.001$ .

## Discussion

### Summary of results

In this study, we aimed to identify abnormal neural activity clusters in PAC, HAC, and AP of tinnitus patients, with and without hearing loss, using the mALFF index. In comparisons between THL and NC1, mALFF maps (Fig. 3) indicate increased values of mALFF in the clusters of bilateral PAC and HAC, but no differences in hubs of the AP, although all subjects in the THL group exhibited right-ear tinnitus with hearing impairment. The value of mALFF activity clusters in the PAC of THL was negatively correlated with RAHL and did not correlate with the THI score, as hyperacusis patients were excluded. The value of mALFF active clusters in HAC was positively correlated with THI, SAS, and SDS. In comparisons between TNH and NC2, mALFF maps (Fig. 4) reveal abnormal activity clusters in HAC, including both decreased and increased activity clusters, and increases in the IC. DTM, THI, SAS, and SDS were positively correlated with mALFF value of the activity cluster in IC.

### **Why was mALFF used as an index to evaluate spontaneous neural baseline activation of the central auditory system?**

Spontaneous neuron activity includes spontaneous firing rate, synchrony between neurons, and bursting in specific neural structure, as physiological correlates of tinnitus (Kaltenbach,2011). Increased synchrony between neurons in the central auditory system could create sound perception (Langers, et al.,2007); thus, it is feasible that increased synchrony in the absence of peripheral auditory system could lead to the perception of a phantom sound (Noreña and Eggermont,2003).

The mechanism of the amplitude of low-frequency fluctuation (ALFF) of the rs-fMRI signal has been demonstrated by several studies, using comparison with epidural electroencephalography (EEG) (Lu, et al.,2007; Mantini, et al.,2007; Shmuel and Leopold,2008; Shtark, et al.,2015). At the level of neural ensembles, a synchronized activity of large numbers of neurons can lead to macroscopic oscillations, which can be observed through EEG and correlated with values of mALFF. In functional connections of rat primary somatosensory cortices, Lu et al. found that, unlike the evoked fMRI response, which correlates with power changes in high-frequency bands, the power coherence in low-frequency bands correlates with mALFF values in the BOLD signal on rs-fMRI, in a region-specific and dose-dependent fashion. (Lu, et al.,2007) Further, the ALFF of the BOLD signal on rs-fMRI correlates with power coherence in low-frequency bands, particularly the delta band of EEG (Lu, et al.,2007). Another study demonstrated that the theta-gamma band of neuronal activity in EEG correlates with spontaneous fluctuations in fMRI signals from the primary and secondary auditory cortex (Shmuel and Leopold,2008; De Ridder D, et al.,2011). In human brains studied by rs-fMRI, each of these networks, deprived by independent components analysis, could be generally associated with more than one kind of electric oscillation, confirming that the brain does not generally display pure rhythms within distinct frequency bands, mostly in restricted neuronal circuits, but shows a coalescence of rhythms, as demonstrated by maps obtained with the previous EEG/fMRI studies on alpha-power correlation in the auditory-phonological system (Mantini, et al.,2007). To summarize, the main findings of previous studies about correlations between ALFF and EEG were as follows. First, ALFF is an index that

can be used to evaluate the level of spontaneous neural synchrony in the resting-state, but not in the evoked brain. Second, ALFF of the BOLD signal on rs-fMRI in human brain correlates with the low frequency band fluctuation, (i.e, alpha, delta, gamma, and theta bands on EEG), which reflects synchronized activity of large numbers of neurons that can lead to macroscopic oscillations and can be observed by ALFF of rs-fMRI. Finally, the brain typically does not display pure rhythms within distinct frequency bands, but exhibits a coalescence of rhythms (Mukamel, et al.,2005). ALFF has been used as an index to evaluate spontaneous neural synchrony in prior studies (Biswal, et al.,1995; Kiviniemi, et al.,2000; Chen, et al.,2014; Lei, et al.,2017). Thus, mALFF was used as an index in our study to evaluate the spontaneous neural synchronization of the central auditory system.

## **Abnormal spontaneous neural activity of central auditory cortex in previous studies of tinnitus with and without hearing loss**

### **Tinnitus with hearing impairment**

Most studies have suggested that the mechanism of tinnitus with hearing loss, absent input from the auditory periphery as a trigger, induces aberrant states of neural activation and reorganization in the central auditory system. (Daniel A. Llano and Caspary,2012; Mulders and Robertson,2013; Chen, et al.,2014) Studies of animal and human images indicate that hearing loss and tinnitus are factors that contribute to elevation in the baseline neural activity of PAC, which induces tinnitus perception. (Engineer, et al.,2011; Yang, et al.,2011; Daniel A. Llano and Caspary,2012; Mulders and Robertson,2013; Chen, et al.,2014) In human research, Peyman et al. combined EEG with MRI to observe patients suffering tinnitus with hearing loss (Peyman, et al.,2012), and found that tinnitus with hearing loss exhibited significant enhancement in the power of the delta band wave in auditory cortex, which was reduced after tinnitus masking. Other studies have similarly suggested that baseline neural activity, as detected by EEG, in PAC can be altered by tinnitus inhibition. (van der Loo E, et al.,2009; Roberts, et al.,2015) This implies that the baseline of spontaneous neural synchrony in PAC can be affected by both hearing threshold and tinnitus. (Kahlbrock and Weisz,2008; van der Loo E, et al.,2009; Peyman, et al.,2012) Studies of tinnitus with hearing loss using auditory steady-state response (ASSR), magnetoencephalography (MEG), and sound-evoked fMRI suggest that abnormal baseline neural activity in PAC correlates with severity of tinnitus (Diesch, et al.,2010, 2010) and hearing threshold. (Gu, et al.,2010) In our study, we found that abnormal hyper-neural activity clusters in PAC correlate with average hearing threshold but not with THI score, suggesting that mALFF of activity clusters in PAC can detect a coalescence of rhythms of spontaneous neural synchronic activity (dominated by input deficit), but cannot observe differences between THL and NC1 for individual tinnitus pitches (as in the THL group).

In most mechanistic studies of tinnitus with hearing loss, researchers are primarily concerned

with abnormal spontaneous neural synchrony in PAC for direct induction of tinnitus perception. Thus, the function of HAC seems to be neglected in tinnitus research. In our study, we found that mALFF value in activity clusters in HAC of the THL group was correlated with THI, as well as SAS and SDS. Moreover, SAS and SDS scores were more intensely correlated with mALFF values of the HAC than THI score, implying that abnormal neural activity of HAC affects the severity of tinnitus, but not tinnitus perception, in THL patients.

The function of HAC was investigated in some studies, suggesting that aberrant neuronal activity in the HAC correlates with selective attention for sound perception, emotional state, and other cognitive processes (Plichta, et al.,2011; Brosch, et al.,2013; Popovych and Tass,2014; Seither-Preisler, et al.,2014; Eggermont and Tass,2015; Balconi and Vanutelli,2016). Thus, the baseline neural activity in HAC might indirectly affect the severity of tinnitus in patients. Paul et al. found that HAC exhibited an increased amplitude, as measured by ASSR, in the control group, but not in the tinnitus with hearing loss group, during tests where both groups were requested to give their attention to the contents of sound stimulation (Paul, et al.,2014), suggesting that an enhancement of baseline neural activity in HAC of the THL group might reduce the ability to react to sound stimulation (during the ASSR assessment) and induce dysfunctional selective attention. An early fMRI study suggests that chronic electrical stimulation of the HAC can suppress tinnitus-based depression score, but does not affect the loudness of tinnitus (Friedland, et al.,2007). Similarly, spontaneous neural activity of HAC, as detected by fMRI, in tinnitus patients with hearing loss was downgraded after effective treatment, and a sub-score of the tinnitus functional index—the relaxation score—significantly decreased (Emmert, et al.,2017). Furthermore, it follows that amplitude of the ASSR was modulated after residual inhibition in PAC, but not in HAC (Roberts, et al.,2015).

Spontaneous neural synchronic modulation in PAC, as evaluated by mALFF, might not correlate with perception of tinnitus, but does correlate with average hearing threshold; in contrast, change in the HAC affects sensory processes of tinnitus patients, including the dysfunction of selective attention, specifically emotional and cognitive processes, thus correlating with severity of tinnitus.

### **Tinnitus without hearing impairment**

Although most tinnitus was induced by obvious hearing loss, some tinnitus patients without hearing loss might exhibit severe tinnitus (Savastano,2008; Martines, et al.,2010). Hidden hearing loss is suspected in this type of tinnitus, which differs from tinnitus with obvious hearing loss.

In our study, increased mALFF value of the active cluster occurred in contra-IC of the right-ear tinnitus patients within the normal audiogram group, implying that an elevated baseline of spontaneous neuronal synchrony occurred in the IC of normal hearing patients. Evidence of hyperactive IC has been found in the animal behavioral tinnitus model (Mulders and Robertson,2009, 2011). However, this hyperactivity may not be a sufficient sole generator of

tinnitus for increased spontaneous neural activity, as it was present even in the absence of behavioral evidence of tinnitus (Coomber, et al.,2014; Ropp, et al.,2014). In auditory nerve fiber deafferentation studies of tinnitus with normal hearing audiograms, studies in humans have shown that the centrally generated wave V occurs as result of reduction in wave I auditory brainstem response (ABR) amplitude, suggesting that the auditory pathway of middle brain might exhibit homeostatic plasticity to elevated neuronal response gain (Aitkin and Phillips,1984; Schaette and McAlpine,2011; Hesse, et al.,2016). Tinnitus sound-evoked fMRI also found that IC showed increased activity after sound stimulation (Smits, et al.,2007; Lanting, et al.,2008; Gu, et al.,2010), but these studies did not exclude hyperacusis (Gu, et al.,2010). Additionally, clinical tinnitus studies offer indirect evidence that modulated somatosensory input affects neural activity of the IC and correlates with the onset of tinnitus (Lanting, et al.,2010; Gritsenko, et al.,2014). Our finding is consistent with the accumulated evidence for hyperactive IC in tinnitus.

The IC is a near-obligatory relay in the ascending auditory pathway, a point where virtually all lemniscal and extra-lemniscal ascending inputs converge(Aitkin and Phillips,1984; Marsh, et al.,2002; Bajo and Moore,2005) and is no longer considered solely as an organizing center for integration of auditory processing, but as a key organ in human emotion response that utilizes considerable non-auditory input (Marsh, et al.,2002; Bajo and Moore,2005; Chen, et al.,2015; Kim, et al.,2017). In our study, the mALFF value of an abnormal neural active cluster in left IC is positively correlated with DTM, THI, SAS, and SDS, supporting previous evidence that modulated spontaneous neural activity of the IC affects emotion and tinnitus severity.

In our study, the mALFF value of the left IC was positively correlated with DTM. One possible etiology for tinnitus with hidden hearing loss is non-traumatic noise exposure, which suggests that the increased spontaneous activity of IC is dependent on external auditory input in the early stages(Coomber, et al.,2014; Ropp, et al.,2014) and can be modulated by ablation of the dorsal cochlear nucleus within 6 weeks of noise exposure(Mulders and Robertson,2009). The hyperactivity of the IC subsequently becomes self-sustaining, as result of homeostatic plasticity in the IC, which is induced by 3–5 months of acoustic exposure(Brozoski and Bauer,2005). However, none of these studies offered a correlation between tinnitus duration and the level of spontaneous neural activity of the IC.

The IC has been characterized as a major locus for the integration of excitatory and inhibitory inputs (Eggermont,2001). As a result of homeostatic plasticity in the IC, the gain to supplement input deficiency at hearing loss frequencies might accompany neural noise and cortical tonotopic map distortion, which would induce the perception of tinnitus(Robertson and Mulders,2012). In our study, we did not find hyperactive clusters in the PAC of the mALFF map for various conditions in the TNH group, including individual tinnitus pitch, different frequency ranges of hidden hearing impairment, and various environmental pathogenic factors. In HAC, we found decreased and increased activity clusters occur at the same time and that decreased mALFF values of the cluster in right HAC are strongly negatively correlated with the right IC (Fig. 7). In an early animal study, auditory neural fibers were found between IC and HAC in the cat (Eggermont and

Kenmochi,1998). More recently, functional connections between the IC and auditory cortex have been reported in some studies (Bajo and Moore,2005; Chen, et al.,2015). Taken together, these prior findings and our results that the mutual interaction between IC and HAC might be the result of homeostatic plasticity in IC.

### **Significance of the results**

In our study, abnormal spontaneous neural activity in the auditory system showed that THL and TNH might exhibit different homeostatic plasticity because of their location in the central auditory system. These subgroups of tinnitus exhibit different spontaneous neural activity in different regions of the auditory system.

These findings suggest that different types of tinnitus can be evaluated by different regions of the auditory system and should be managed by different treatments, such as repetitive transcranial magnetic stimulation(De, et al.,2011), neurofeedback(Emmert, et al.,2017), and transcutaneous electrical nerve stimulation (Tyler, et al.,2017). In future studies, we will collect more mALFF data from the auditory cortex and auditory pathway of healthy subjects, and will evaluate relationships with age, years of education, and sex, to be used as a standard index to evaluate severity and classification of tinnitus.

### **Study limitations**

First, our study observed the relationship between an abnormal mALFF of the auditory system and tinnitus characteristics in a cross-sectional format with a small sample size ( $n < 30$ ). Therefore, future studies must analyze a larger subgroup of tinnitus cases and include lateral tinnitus, hearing impairment grading, age grouping, and multiple etiologies, across multiple centers. Moreover, we cannot completely eliminate the substantial acoustic noise produced during the fMRI procedure with ear plugs and MRI noise-cancelling headphones, which might affect baseline neural activity (Rondinoni, et al.,2013). Finally, the neural activity of special regions in the auditory system might be modulated by attention in consciousness (Jäncke, et al.,1999; Martinez-Granados, et al.,2014; Ghazaleh, et al.,2017) and we cannot be sure that all subjects followed all requirements, including keeping eyes closed, staying relaxed, and avoiding any thinking.

### **Conclusion**

The subgroups of tinnitus with and without hearing impairment might exhibit different homeostatic plasticity at the level of the central auditory system; THL showed an abnormal spontaneous neural active cluster in HAC, correlating with tinnitus characteristics, whereas TNH showed abnormal activity in the IC. Thus, the value of mALFF in the auditory system partly reflects the severity of tinnitus in specific situations.

## Acknowledgments

The authors thank Prof. Xiang-Li Zeng, Department of Otolaryngology-Head & Neck Surgery, The Third Affiliated Hospital of Sun Yat-sen University, China. This study was supported by the Science and Technology Planning Project of Panyu District of GuangZhou City, China (Grant Number: 2015-Z03-41) and by the Medical Master and Doctor Foundation of the Central Hospital of Panyu District, Guangzhou, China (Grant Number: 2016-S-03).

## References

- Aitkin LM, Phillips SC. 1984. Is the inferior colliculus an obligatory relay in the cat auditory system. *Neurosci Lett.* 44(3): 259-64.
- Bajo VM, Moore DR. 2005. Descending projections from the auditory cortex to the inferior colliculus in the gerbil, *Meriones unguiculatus*. *J Comp Neurol.* 486(2): 101-16.
- Balconi M, Vanutelli ME. 2016. Hemodynamic (fNIRS) and EEG (N200) correlates of emotional inter-species interactions modulated by visual and auditory stimulation. *Sci Rep.* 6: 23083.
- Biswal B, Yetkin FZ, Haughton VM, Hyde JS. 1995. Functional connectivity in the motor cortex of resting human brain using echo-planar MRI. *Magn Reson Med.* 34(4): 537-41.
- Brett M, Anton JL, Valabregue R, Poline JB. 2002. Region of interest analysis using the MarsBar toolbox for SPM 99. *Neuroimage.* 16(2).
- Brosch M, Budinger E, Scheich H. 2013. Different synchronization rules in primary and nonprimary auditory cortex of monkeys. *J Cogn Neurosci.* 25(9): 1517-26.
- Brozoski TJ, Bauer CA. 2005. The effect of dorsal cochlear nucleus ablation on tinnitus in rats. *Hear Res.* 206(1-2): 227-36.
- Burton H, Wineland A, Bhattacharya M, Nicklaus J, Garcia KS, Piccirillo JF. 2012. Altered networks in bothersome tinnitus: a functional connectivity study. *BMC Neurosci.* 13: 3.
- Chen GD, Radziwon KE, Kashanian N, Manohar S, Salvi R. 2014. Salicylate-Induced Auditory Perceptual Disorders and Plastic Changes in Nonclassical Auditory Centers in Rats. *Neural Plast.* 2014(8): 658741.
- Chen YC, Li X, Liu L, et al. 2015. Tinnitus and hyperacusis involve hyperactivity and enhanced connectivity in auditory-limbic-arousal-cerebellar network. *Elife.* 4: e06576.
- Chen YC, Zhang J, Li XW, et al. 2014. Aberrant spontaneous brain activity in chronic tinnitus patients revealed by resting-state functional MRI. *Neuroimage Clin.* 6: 222-8.
- Coomer B, Berger JI, Kowalkowski VL, Shackleton TM, Palmer AR, Wallace MN. 2014. Neural changes accompanying tinnitus following unilateral acoustic trauma in the guinea pig. *Eur J Neurosci.* 40(2): 2427-41.
- Core TR. 2015. A Language and Environment for Statistical Computing. *Computing.* 1: 12-21.
- Daniel A, Llano JT, Caspary DM. 2012. Diminished cortical inhibition in an aging mouse model of chronic tinnitus. *Journal of Neuroscience the Official Journal of the Society for Neuroscience.* 32(46): 16141.
- De RD, Vanneste S, Kovacs S, et al. 2011. Transcranial magnetic stimulation and extradural electrodes implanted on secondary auditory cortex for tinnitus suppression. *J Neurosurg.* 114(4): 903-11.
- De Ridder D, van der Loo E, Vanneste S, et al. 2011. Theta-gamma dysrhythmia and auditory phantom perception. *J Neurosurg.* 114(4): 912-21.
- Diesch E, Andermann M, Flor H, Rupp A. 2010. Functional and structural aspects of tinnitus-related enhancement



- and suppression of auditory cortex activity. *Neuroimage*. 50(4): 1545-59.
- Diesch E, Andermann M, Flor H, Rupp A. 2010. Interaction among the components of multiple auditory steady-state responses: enhancement in tinnitus patients, inhibition in controls. *Neuroscience*. 167(2): 540-53.
- Dong S, Mulders WH, Rodger J, Woo S, Robertson D. 2010. Acoustic trauma evokes hyperactivity and changes in gene expression in guinea-pig auditory brainstem. *European Journal of Neuroscience*. 31(9): 1616 – 1628.
- Eggermont JJ. 2001. Between sound and perception: reviewing the search for a neural code. *Hear Res*. 157(1-2): 1-42.
- Eggermont JJ, Kenmochi M. 1998. Salicylate and quinine selectively increase spontaneous firing rates in secondary auditory cortex. *Hear Res*. 117(1 – 2): 149-160.
- Eggermont JJ, Tass PA. 2015. Maladaptive Neural Synchrony in Tinnitus: Origin and Restoration. *Front Neurol*. 6(4): 29.
- Emmert K, Kopel R, Koush Y, et al. 2017. Continuous vs. intermittent neurofeedback to regulate auditory cortex activity of tinnitus patients using real-time fMRI - A pilot study. *Neuroimage Clin*. 14: 97-104.
- Engineer ND, Riley JR, Seale JD, et al. 2011. Reversing pathological neural activity using targeted plasticity. *Nature*. 470(7332): 101-4.
- Friedland DR, Gaggl W, Runge-Samuels C, Ulmer JL, Kopell BH. 2007. Feasibility of auditory cortical stimulation for the treatment of tinnitus. *Otology & Neurotology*. 28(8): 1005.
- Ghazaleh N, Zwaag WV, Clarke S, Ville DV, Maire R, Saenz M. 2017. High-Resolution fMRI of Auditory Cortical Map Changes in Unilateral Hearing Loss and Tinnitus. *Brain Topogr*. : 1-13.
- Gritsenko K, Caldwell W, Shaparin N, Vydyanathan A, Kosharsky B. 2014. Resolution of long standing tinnitus following radiofrequency ablation of C2-C3 medial branches--a case report. *Pain Physician*. 17(1): E95-8.
- Gu JW, Halpin CF, Nam EC, Levine RA, Melcher JR. 2010. Tinnitus, Diminished Sound-Level Tolerance, and Elevated Auditory Activity in Humans With Clinically Normal Hearing Sensitivity. *J Neurophysiol*. 104(6): 3361-70.
- Hesse LL, Bakay W, Ong HC, et al. 2016. Non-Monotonic Relation between Noise Exposure Severity and Neuronal Hyperactivity in the Auditory Midbrain. *Front Neurol*. 7: 133.
- Hoffman HJ. 2014. The Epidemiology of Tinnitus. *Hearing Health*. .
- Huang M, Lu S, Liang Y, et al. 2017. Altered fractional amplitude of low frequency fluctuation associated with cognitive dysfunction in first-episode drug-naïve major depressive disorder patients. *BMC Psychiatry*. 17(1): 11.
- Husain FT, Medina RE, Davis CW, et al. 2011. Neuroanatomical changes due to hearing loss and chronic tinnitus: a combined VBM and DTI study. *Brain Res*. 1369: 74-88.
- Jäncke L, Mirzazade S, Shah NJ. 1999. Attention modulates activity in the primary and the secondary auditory cortex: a functional magnetic resonance imaging study in human subjects. *Neurosci Lett*. 266(2): 125-8.
- Kahlbrock N, Weisz N. 2008. Transient reduction of tinnitus intensity is marked by concomitant reductions of delta band power. *BMC Biol*. 6(1): 4.
- Kaltenbach JA. 2011. Tinnitus: Models and mechanisms. *Hear Res*. 276(1 – 2): 52-60.
- Kim J, Kim Y, Lee S, et al. 2012. Alteration of functional connectivity in tinnitus brain revealed by resting-state fMRI?: A pilot study. *Int J Audiol*. 51(5): 413.
- Kim SG, Lepsien J, Fritz TH, Mildner T, Mueller K. 2017. Dissonance encoding in human inferior colliculus covaries with individual differences in dislike of dissonant music. *Sci Rep*. 7(1): 5726.
- Kiviniemi V, Jauhiainen J, Tervonen O, et al. 2000. Slow vasomotor fluctuation in fMRI of anesthetized child brain. *Magn Reson Med*. 44(3): 373-378.
- Landgrebe M, Langguth B, Rosengarth K, et al. 2009. Structural brain changes in tinnitus: grey matter decrease in auditory and non-auditory brain areas. *Neuroimage*. 46(1): 213-8.
- Langers D, Backes WD, P. 2007. Representation of lateralization and tonotopy in primary versus secondary human

- auditory cortex. *Neuroimage*. 34(1): 264-273.
- Langguth B. 2011. A review of tinnitus symptoms beyond 'ringing in the ears': a call to action. *Curr Med Res Opin*. 27(8): 1635-43.
- Lanting CP, De KE, Bartels H, Van DP. 2008. Functional imaging of unilateral tinnitus using fMRI. *Acta Otolaryngol*. 128(4): 415-21.
- Lanting CP, de Kleine E, Eppinga RN, van Dijk P. 2010. Neural correlates of human somatosensory integration in tinnitus. *Hear Res*. 267(1-2): 78-88.
- Lei X, Zhong M, Ying L, et al. 2017. A resting-state fMRI study in borderline personality disorder combining amplitude of low frequency fluctuation, regional homogeneity and seed based functional connectivity. *J Affect Disord*. 218: 299.
- Lu H, Zuo Y, Gu H, et al. 2007. Synchronized delta oscillations correlate with the resting-state functional MRI signal. *Proc Natl Acad Sci U S A*. 104(46): 18265-9.
- Mantini D, Perrucci MG, Gratta CD, Romani GL, Corbetta M. 2007. Electrophysiological signatures of resting state networks in the human brain. *Proc Natl Acad Sci U S A*. 104(32): 13170.
- Marsh RA, Fuzessery ZM, Grose CD, Wenstrup JJ. 2002. Projection to the inferior colliculus from the basal nucleus of the amygdala. *J Neurosci*. 22(23): 10449-60.
- Martines F, Bentivegna D, Martines E, Sciacca V, Martinciglio G. 2010. Assessing audiological, pathophysiological and psychological variables in tinnitus patients with or without hearing loss. *Eur Arch Otorhinolaryngol*. 267(11): 1685-93.
- Martinez-Granados B, Martinez-Bisbal MC, Sanjuan J, et al. 2014. Study of the inferior colliculus in patients with schizophrenia by magnetic resonance spectroscopy. *Rev Neurol*. 59(1): 1-7.
- Maudoux A, Lefebvre P, Cabay JE, et al. 2012. Auditory resting-state network connectivity in tinnitus: a functional MRI study. *PLoS One*. 7(5): e36222.
- Maudoux A, Lefebvre P, Cabay JE, et al. 2012. Connectivity graph analysis of the auditory resting state network in tinnitus. *Brain Res*. 1485: 10-21.
- Meng Z, Zheng Y, Liu S, et al. 2012. Reliability and validity of the chinese (mandarin) tinnitus handicap inventory. *Clinical & Experimental Otorhinolaryngology*. 5(1): 10.
- Morosan P, Rademacher J, Schleicher A, Amunts K, Schormann T, Zilles K. 2001. Human Primary Auditory Cortex: Cytoarchitectonic Subdivisions and Mapping into a Spatial Reference System. *Neuroimage*. 13(4): 684.
- Morosan P, Schleicher A, Amunts K, Zilles K. 2005. Multimodal architectonic mapping of human superior temporal gyrus. *Brain Structure and Function*. 210(5): 401-406.
- Mukamel R, Gelbard H, Arieli A, Hasson U, Fried I, Malach R. 2005. Coupling between neuronal firing, field potentials, and fMRI in human auditory cortex. *Science*. 309(5736): 951-4.
- Mulders WH, Robertson D. 2009. Hyperactivity in the auditory midbrain after acoustic trauma: dependence on cochlear activity. *Neuroscience*. 164(2): 733-46.
- Mulders WH, Robertson D. 2011. Progressive centralization of midbrain hyperactivity after acoustic trauma. *Neuroscience*. 192: 753-60.
- Mulders WHAM, Robertson D. 2013. Development of hyperactivity after acoustic trauma in the guinea pig inferior colliculus. *Hear Res*. 298(1): 104-108.
- Mühlau M, Rauschecker JP, Oestreicher E, et al. 2006. Structural brain changes in tinnitus. *Cereb Cortex*. 16(9): 1283-1288.
- Mühlnickel W, Elbert T, Taub E, Flor H. 1998. Reorganization of auditory cortex in tinnitus. *Proc Natl Acad Sci U S A*. 95(17): 10340.
- NeuroImage*. 2005. Eickhoff SB, Stephan KE, Mohlberg H, Grefkes C, Fink GR, Amunts K, Zilles KA new SPM

- toolbox for combining probabilistic cytoarchitectonic maps and functional imaging data. *Neuroimage* 25:1325-1335. *Neuroimage*. 25(4): 1325-1335.
- Nichols TE. 2010. Threshold-free cluster enhancement (TFCE) : improving power and stability of cluster size inference in brain imaging. Joint Statistical Meeting. .
- Noreña AJ, Eggermont JJ. 2003. Changes in spontaneous neural activity immediately after an acoustic trauma: implications for neural correlates of tinnitus. *Hear Res*. 183(1-2): 137.
- Paul BT, Bruce IC, Bosnyak DJ, Thompson DC, Roberts LE. 2014. Modulation of electrocortical brain activity by attention in individuals with and without tinnitus. *Neural Plast*. 2014: 127824.
- Peyman A, Magdalena S, Oliver Z, Hall DA, Palmer AR. 2012. Neuromagnetic Indicators of Tinnitus and Tinnitus Masking in Patients with and without Hearing Loss. *Journal of the Association for Research in Otolaryngology*. 13(5): 715-731.
- Plichta MM, Gerdes AB, Alpers GW, et al. 2011. Auditory cortex activation is modulated by emotion: a functional near-infrared spectroscopy (fNIRS) study. *Neuroimage*. 55(3): 1200-1207.
- Popovych OV, Tass PA. 2014. Control of abnormal synchronization in neurological disorders. *Front Neurol*. 5: 268.
- Ralli M, Lobarinas E, Fetoni AR, Stolzberg D, Paludetti G, Salvi R. 2010. Comparison of salicylate and quinine induced tinnitus in rats; development, time course and evaluation of audiological correlates. *Otology & Neurotology*. 31(5): 823-831.
- Roberts LE, Bosnyak DJ, Bruce IC, Gander PE, Paul BT. 2015. Evidence for differential modulation of primary and nonprimary auditory cortex by forward masking in tinnitus. *Hear Res*. 327: 9-27.
- Robertson D, Mulders W. 2012. *The Inferior Colliculus: Involvement in Hyperactivity and Tinnitus*. Springer New York.
- Rondinoni C, E. Amaro J, Cendes F, Santos ACD, Salmon CEG. 2013. Effect of scanner acoustic background noise on strictesting-state fMRI. *Brazilian Journal of Medical & Biological Research*. 46(4): 359-367.
- Ropp TJ, Tiedemann KL, Young ED, May BJ. 2014. Effects of unilateral acoustic trauma on tinnitus-related spontaneous activity in the inferior colliculus. *J Assoc Res Otolaryngol*. 15(6): 1007-22.
- Rusiniak M, Lewandowska M, Wolak T, Pluta A, Milner R, Skarzyński H. 2015. [The possibilities and limitations of simultaneous EEG-fMRI registration--the alpha rhythm study]. *Przegląd Lekarski*. 72(11): 616.
- Savastano M. 2008. Tinnitus with or without hearing loss: are its characteristics different. *Eur Arch Otorhinolaryngol*. 265(11): 1295-300.
- Schaette R, McAlpine D. 2011. Tinnitus with a normal audiogram: physiological evidence for hidden hearing loss and computational model. *J Neurosci*. 31(38): 13452-7.
- Seither-Preisler A, Parncutt R, Schneider P. 2014. Size and synchronization of auditory cortex promotes musical, literacy, and attentional skills in children. *Journal of Neuroscience the Official Journal of the Society for Neuroscience*. 34(33): 10937.
- Seydell-Greenwald A, Raven EP, Leaver AM, Turesky TK, Rauschecker JP. 2014. Diffusion imaging of auditory and auditory-limbic connectivity in tinnitus: preliminary evidence and methodological challenges. *Neural Plast*. 2014: 145943.
- Shmuel A, Leopold DA. 2008. Neuronal correlates of spontaneous fluctuations in fMRI signals in monkey visual cortex: Implications for functional connectivity at rest. *Hum Brain Mapp*. 29(7): 751-61.
- Shtark MB, Verevkin EG, Kozlova LI, et al. 2015. Synergetic fMRI-EEG brain mapping in alpha-rhythm voluntary control mode. *Bull Exp Biol Med*. 158(5): 644-9.
- Smits M, Kovacs S, Ridder DD, Peeters RR, Hecke PV, Sunaert S. 2007. Lateralization of functional magnetic resonance imaging (fMRI) activation in the auditory pathway of patients with lateralized tinnitus. *Neuroradiology*. 49(8): 669-79.

- Tyler R, Cacace A, Stocking C, et al. 2017. Vagus Nerve Stimulation Paired with Tones for the Treatment of Tinnitus: A Prospective Randomized Double-blind Controlled Pilot Study in Humans. *Sci Rep.* 7(1): 11960.
- van der Loo E, Gais S, Congedo M, et al. 2009. Tinnitus intensity dependent gamma oscillations of the contralateral auditory cortex. *PLoS One.* 4(10): e7396.
- Winkler AM, Ridgway GR, Douaud G, Nichols TE, Smith SM. 2016. Faster permutation inference in brain imaging. *Neuroimage.* 141: 502-516.
- Xu X, Bu X, Zhou L, Xing G, Liu C, Wang D. 2011. An epidemiologic study of tinnitus in a population in Jiangsu Province, China. *J Am Acad Audiol.* 22(9): 578-585.
- Yan CG, Wang XD, Zuo XN, Zang YF. 2016. DPABI: Data Processing & Analysis for (Resting-State) Brain Imaging. *Neuroinformatics.* 14(3): 339-351.
- Yang S, Weiner BD, Zhang LS, Cho SJ, Bao S. 2011. Homeostatic plasticity drives tinnitus perception in an animal model. *Proc Natl Acad Sci U S A.* 108(36): 14974-9.
- Zang YF, He Y, Zhu CZ, et al. 2007. Altered baseline brain activity in children with ADHD revealed by resting-state functional MRI. *Brain Dev.* 29(2): 83-91.
- Zung WW. 1971. A rating instrument for anxiety disorders. *Psychosomatics.* 12(6): 371-379.
- Zung WWK. 1986. Zung Self-Rating Depression Scale and Depression Status Inventory.
